# Supplementary material
Source: Springer Nature journal article supplement (https://www.springermedizin.de/resource/supplementary/12968_2009_945_MOESM4_ESM.pdf/9580012)

*FWHM (ms)*

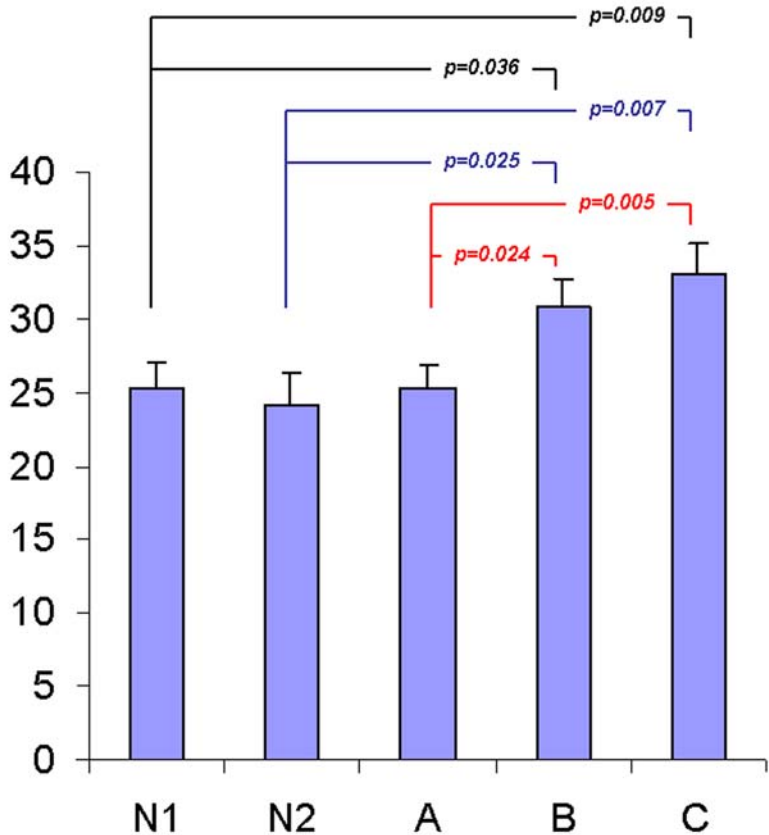

Supplement: MOESM4 [file 9580012]
